# Supplementary material
Source: publisher site journal article supplement (https://www.dovepress.com/article/451393)

**Supplementary Fig.1** Kinetics of the ORF1ab Ct value: patients’ Ct value was stratified based on comorbidities, such as coronary heart disease(a), stroke(b), arrhythmia(c), thrombotic diseases(d), and heart failure(e), as well as symptoms, including cough(f), expectoration(g), asthenia(h), nasal congestion(i), sore throat(j), runny nose(k), and dyspnea(l). No statistical differences were found.
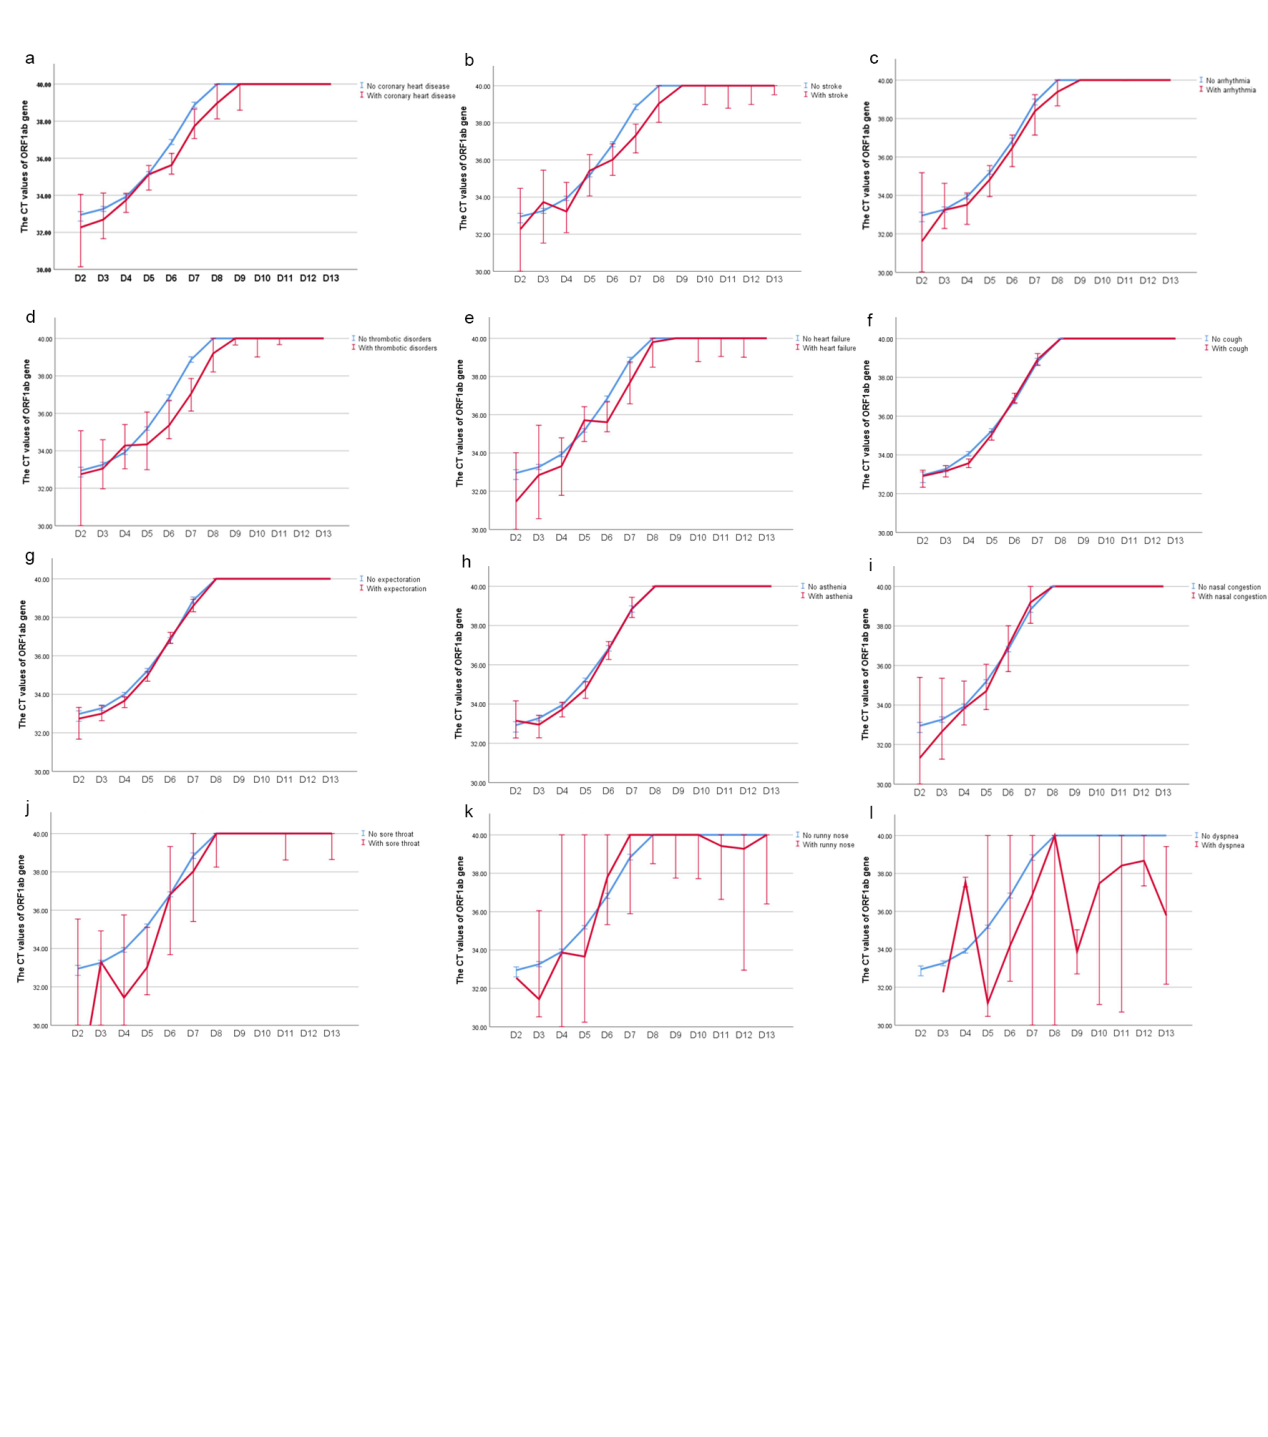

Supplement: Supplementary file 1 [file get_supplementary_file.php]
